# Supplementary material for: Adverse Pregnancy Outcomes and Maternal Chronic Diseases in the Future: A Cross-Sectional Study Using KoGES-HEXA Data
Source: MDPI journal article supplement (doi:10.3390/jcm11051457), 2022-03-07
Supplement: s1 [file s1]

## Supplementary Materials

**Table S1.** Logistic regression analysis for APOs for predicting chronic disease.

|                    | Hypertension         | Diabetes mellitus    | Hyperlipidemia       | Transient ischemia   | Stroke               | Angina pectoris      |
|--------------------|----------------------|----------------------|----------------------|----------------------|----------------------|----------------------|
|                    | OR (95% CI)          |
| Composite APOs     | 0.979 (0.906, 1.058) | 1.184 (1.042, 1.344) | 1.177 (1.048, 1.322) | 0.692 (0.294, 1.631) | 1.225 (0.942, 1.593) | 1.127 (0.913, 1.390) |
| Preeclampsia       | 1.380 (1.219, 1.562) | 1.055 (0.839, 1.326) | 1.249 (1.027, 1.518) | 1.312 (0.407, 4.229) | 1.311 (0.848, 2.025) | 1.336 (0.954, 1.872) |
| GDM                | 0.896 (0.635, 1.265) | 3.780 (2.680, 5.333) | 1.291 (0.806, 2.067) | -                    | 0.739 (0.183, 2.983) | 0.442 (0.110, 1.780) |
| Stillbirth         | 1.378 (1.023, 1.857) | 1.272 (0.764, 2.117) | 0.959 (0.568, 1.620) | -                    | 2.198 (0.971, 4.973) | 1.081 (0.444, 2.632) |
| Macrosomia         | 0.778 (0.694, 0.871) | 1.371 (1.165, 1.614) | 1.151 (0.982, 1.347) | 0.236 (0.033, 1.714) | 1.188 (0.832, 1.697) | 1.042 (0.777, 1.396) |
| LBW                | 0.963 (0.837, 1.107) | 0.734 (0.559, 0.964) | 1.078 (0.872, 1.332) | 1.382 (0.429, 4.458) | 1.180 (0.741, 1.880) | 1.043 (0.711, 1.530) |
| Preeclampsia only  | 1.403 (1.236, 1.592) | 1.031 (0.813, 1.309) | 1.301 (1.068, 1.585) | 1.373 (0.426, 4.428) | 1.381 (0.894, 2.134) | 1.364 (0.969, 1.919) |
| GDM only           | 0.889 (0.584, 1.355) | 4.796 (3.258, 7.059) | 1.768 (1.067, 2.930) |                      | 1.109 (0.274, 4.491) | 0.330 (0.046, 2.355) |
| Preeclampsia + GDM | 0.961 (0.528, 1.749) | 1.900 (0.871, 4.143) | 0.408 (0.100, 1.662) |                      |                      | 0.707 (0.098, 5.095) |

Abbreviations: aOR, adjusted odds ratio; CI, confidence interval; APOs, adverse pregnancy outcome; GDM, gestational diabetes; LBW, low birth weight.

**Table S2.** Logistic regression analysis for APOs for predicting metabolic syndrome and its components.

|                    | Metabolic syndrome   | Abdominal obesity    | Elevated BP          | Elevated FBS         | Low HCL-C            | High TG              |
|--------------------|----------------------|----------------------|----------------------|----------------------|----------------------|----------------------|
|                    | OR (95% CI)          |
| Composite APOs     | 0.957 (0.888, 1.031) | 1.036 (0.970, 1.108) | 0.964 (0.907, 1.025) | 1.108 (1.034, 1.187) | 0.951 (0.890, 1.015) | 0.958 (0.891, 1.031) |
| Preeclampsia       | 1.073 (0.944, 1.219) | 1.123 (1.002, 1.259) | 1.319 (1.188, 1.465) | 1.055 (0.934, 1.191) | 0.926 (0.825, 1.039) | 0.986 (0.868, 1.119) |
| GDM                | 1.136 (0.834, 1.548) | 0.945 (0.705, 1.267) | 0.934 (0.717, 1.216) | 1.972 (1.513, 2.572) | 0.982 (0.741, 1.302) | 0.976 (0.713, 1.336) |
| Stillbirth         | 1.335 (0.998, 1.786) | 1.269 (0.969, 1.663) | 1.484 (1.154, 1.910) | 1.215 (0.915, 1.613) | 1.071 (0.816, 1.406) | 1.315 (0.989, 1.749) |
| Macrosomia         | 0.946 (0.853, 1.048) | 1.193 (1.092, 1.304) | 0.804 (0.738, 0.875) | 1.222 (1.114, 1.340) | 0.977 (0.894, 1.069) | 0.919 (0.831, 1.016) |
| LBW                | 0.810 (0.703, 0.933) | 0.728 (0.640, 0.828) | 0.941 (0.844, 1.050) | 0.845 (0.741, 0.963) | 0.894 (0.794, 1.008) | 0.980 (0.860, 1.116) |
| Preeclampsia only  | 1.068 (0.937, 1.218) | 1.114 (0.991, 1.253) | 1.337 (1.201, 1.488) | 1.041 (0.918, 1.179) | 0.940 (0.835, 1.058) | 0.977 (0.858, 1.113) |
| GDM only           | 1.123 (0.771, 1.636) | 0.815 (0.564, 1.178) | 0.915 (0.664, 1.261) | 2.259 (1.646, 3.101) | 1.135 (0.814, 1.581) | 0.902 (0.612, 1.330) |
| Preeclampsia + GDM | 1.176 (0.684, 2.021) | 1.275 (0.784, 2.072) | 1.016 (0.640, 1.614) | 1.459 (0.892, 2.384) | 0.691 (0.402, 1.187) | 1.139 (0.670, 1.937) |

Abbreviations: BP, blood pressure; FBS, fasting blood sugar; HDL-C, high-density lipoprotein cholesterol; TG, triglyceride; aOR, adjusted odds ratio; CI, confidence interval; APO, adverse pregnancy outcome; GDM, gestational diabetes; LBW, low birth weight.
